# Supplementary material for: LINC00667 Inhibits the Progression of Endometrial Cancer by Regulating MAGEH1 and the BCL2-Mediated Apoptosis Signalling Pathway
Source: Research Square preprint supplement (doi:10.21203/rs.3.rs-6491955/v1), 2025-05-20
Supplement: Supplementary file 1 [file 213d2ba0e230dc1048dc0900.docx]

**Table S1. Antibodies in this study.**

| **Antibody** | **Item number** | **Manufacturer** |
| --- | --- | --- |
| PTG MAGEH1 Polyclonal antibody | 12424-1-AP-50ul | Proteintech |
| PTG GAPDH Antibody Rabbit Polyclonal | 20536-1-AP/10494-1-AP | Proteintech |
| PTG BCL2 Polyclonal Antibody | 12789-1-AP-50ul | Proteintech |
| PTG BAX Antibody Rabbit Polyclonal | 50599-2-Ig-50ul | Proteintech |
| PTG HRP-conjugated Affinipure Goat Anti-Rabbit IgG(H+L) | SA00001-2-100ul | Proteintech |
