# Supplementary material for: LINC00667 Inhibits the Progression of Endometrial Cancer by Regulating MAGEH1 and the BCL2-Mediated Apoptosis Signalling Pathway
Source: Research Square preprint supplement (doi:10.21203/rs.3.rs-6491955/v1), 2025-05-20
Supplement: Supplementary file 2 [file 74609e96bbe9aa04f4627405.docx]

Table S4 The main reagents and manufacturer used in study

| Reagent | Item No. | Specification | Manufacturer |
| --- | --- | --- | --- |
| DNA loading buffer | D0071 | 2mL | Beyotime Biotechnology |
| 50×Tris Acetate-EDTA buffer | T1060-500ml | 500mL | Solarbio |
| DNase/RNase-Free Distilled Water | R1600-100ml | 100mL | Solarbio |
| Isopropanol | YICHUN-2500mL | 2500mL | Xilong Scientific |
| Fetal bovine serum | 11011-8611 | 100mL | Ever Green |
| Penicillin Streptomycin (100×) | P1400-100 | 100mL | Solarbio |
| Trypsin-EDTA Liquid (0.25%) with Phenol Red | T1320-100 | 100mL | Solarbio |
| 1×Phosphate-Buffered Saline buffer | P1020-500 | 500mL | Solarbio |
| Dulbecco's Modified Eagle Medium | C11995500BT | 500mL | Gibco |
| Absolute ethyl alcohol | YICHUN-2500ml | 2500mL | Chengdu Kelong Chemical |
| Dulbecco's Modified Eagle Medium Gibco/F-12 Medium | C11330500BT | 00mL | Gibco |
| CCK8 kit | BS350B | 500T | Biosharp |
| Matrigel | 356231 | 10mL | Corning |
| Crystal Violet | 20211210 | 10mL | BKMANLAB |
| Annexin V FITC | BL110A | 50T | Biosharp |
| Lipo8000 Transfection Reagent | C0533-0.5ml | 0.5mL | Beyotime Biotechnology |
| RPMI-1640 | C11875500BT | 500mL | Gibco |
