# Supplementary material for: LINC00667 Inhibits the Progression of Endometrial Cancer by Regulating MAGEH1 and the BCL2-Mediated Apoptosis Signalling Pathway
Source: Research Square preprint supplement (doi:10.21203/rs.3.rs-6491955/v1), 2025-05-20
Supplement: Supplementary file 3 [file 892b9342f5cb8c9d232a53ec.xlsx]

## Sheet: Sheet1
Information of Gene sequence				Vector information				Gene accession
Name	Sequence	Length	Species	Name	Sequence	Length	Resistance
LINC00667 over-expression plasmid	GAGCGGGGAGCAAGGCCTGCGGGGAGGCGCAGGATGGACGCGTTGGCTGTCATGATGTAGGACCTCCTGACCTAGAACCATGCCCGGCGCAGGGAGAACAACGAGCTTACGGACCGGGTGCGGGGGCTGCTGTGCGAGAAAGCCTACCTGCTGGCCCGGGAGCGTTCGCCGGCCCACCTGGTGGCTTTCCCTGGACGTTTAACGGCGACTCCGCCCGGCCTCCCGACTTTTTGATGCAGGCGTTCTCTTACATGACTTTCTTCGAGGCTAGATTCTCGAAAGACATCCTGAAGGTGGCTTTCTTAATTAGCTGCCTCACCGGCTGGCGGAGCAGTTCGTAGTCGCCTACATCGAGAGGGAGAGCCCCGTCCTGGCTCAGTACTGGGGCTTCGTGGACGC…	3978	Homo sapiens	pUC57	TCGCGCGTTTCGGTGATGACGGTGAAAACCTCTGACACATGCAGCTCCCGGAGACGGTCACAGCTTGTCTGTAAGCGGATGCCGGGAGCAGACAAGCCCGTCAGGGCGCGTCAGCGGGTGTTGGCGGGTGTCGGGGCTGGCTTAACTATGCGGCATCAGAGCAGATTGTACTGAGAGTGCACCATATGCGGTGTGAAATACCGCACAGATGCGTAAGGAGAAAATACCGCATCAGGCGCCATTCGCCATTCAGGCTGCGCAACTGTTGGGAAGGGCGATCGGTGCGGGCCTCTTCGCTATTACGCCAGCTGGCGAAAGGGGGATGTGCTGCAAGGCGATTAAGTTGGGTAACGCCAGGGTTTTCCCAGTCACGACGTTGTAAAACGACGGCCAGTGAAT…	2710	Ampicillin	NR_015389.1
