# Supplementary material for: LINC00667 Inhibits the Progression of Endometrial Cancer by Regulating MAGEH1 and the BCL2-Mediated Apoptosis Signalling Pathway
Source: Research Square preprint supplement (doi:10.21203/rs.3.rs-6491955/v1), 2025-05-20
Supplement: Supplementary file 4 [file e4d939f9308294f407222b21.docx]

**Table S2. siRNAs sequence**

| Non-targeting | siControl#1 | 5'-UGGUUUACAUGUCGACUAAUU-3’ |
| --- | --- | --- |
| MAGEH1 | si MAGEH1#1 | 5’-CAGTGATCATTGTTCAACT-3’ |
